# Supplementary material for: Neurobehavioral characteristics of mice with SETD5 mutations as models of IDD23 and KBG syndromes
Source: Frontiers journal article supplement (doi:10.3389/fgene.2022.1022339), 2023-01-04
Supplement: Image_1.PDF [file Image_1.PDF]

**A**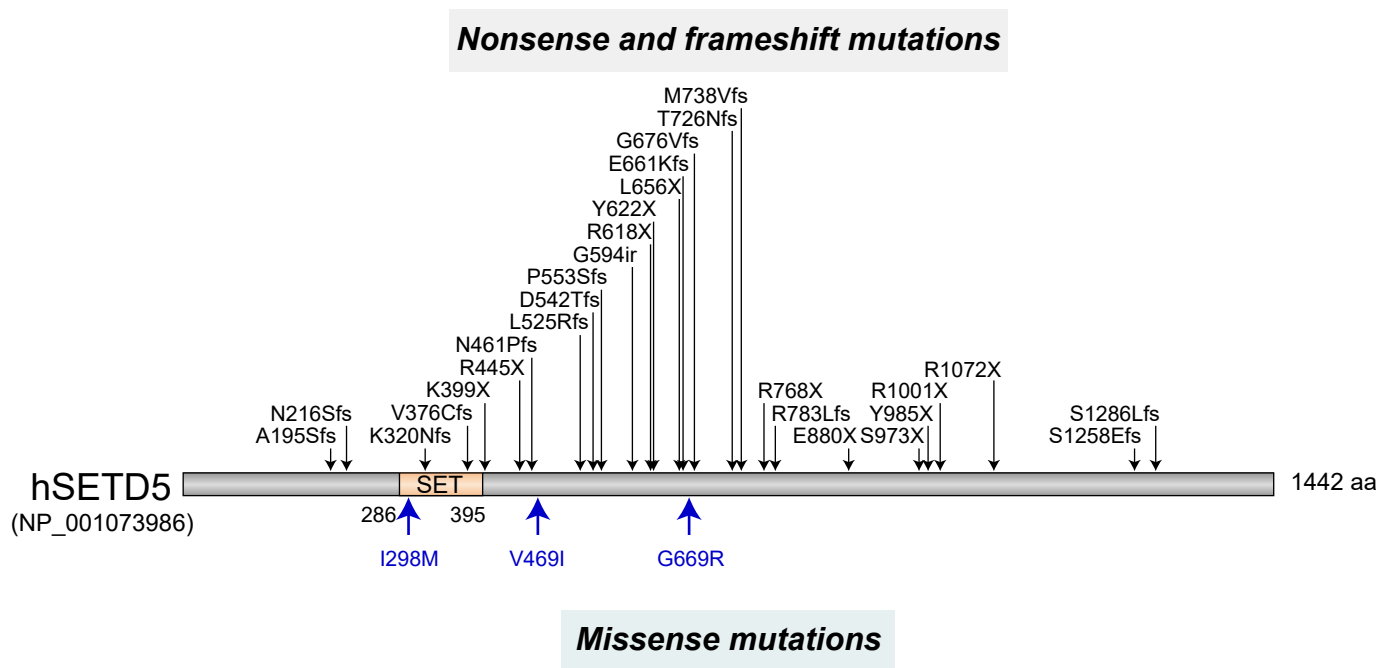**B**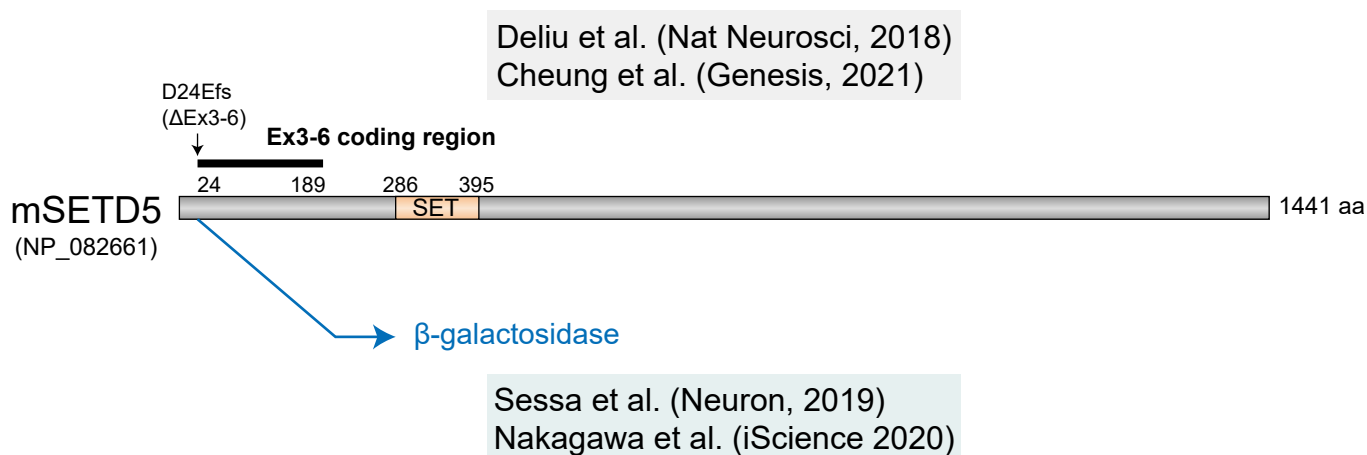

**Supplementary Figure:** Domain structure of human and mouse SETD5 with the locations of mutations. **(A)** Domain structure of human SETD5. Nonsense, frameshift and missense mutations found in IDD and KBG syndrome patients are shown. Individual amino acid is represented by single letter notation. SET, Su(var)3-9, Enhancer-of-zeste and Trithorax; X, stop codon; fs, frameshift; ir, intron retention. **(B)** Domain structure of mouse SETD5. *Setd5* mutant mice in Deliu et al. (Nat Neurosci, 2018) and Cheung et al. (Genesis, 2021) harbor mutation resulting in D to E substitution at 24th amino acid residue followed by frameshift, while Sessa et al. (Neuron, 2019) and Nakagawa et al. (iScience, 2020) utilized mice which contain  $\beta$ -galactosidase fused to first 23 amino acid residues in place of wild-type SETD5. *Setd5* mutant mice in Moore et al. (Transl Psychiatry, 2019) have *GFP-polyA* cassette located at the upstream of the translation initiation sequence of *Setd5*, resulting in the expression of GFP where wild-type SETD5 is otherwise expressed (not shown).
