# Supplementary material for: Neurobehavioral characteristics of mice with SETD5 mutations as models of IDD23 and KBG syndromes
Source: Front Genet. 2023 Jan 4;13:1022339. doi: 10.3389/fgene.2022.1022339 (PMC9846138; doi:10.3389/fgene.2022.1022339)
Supplement: Supplementary file 1 [file Table1.XLSX]

## Sheet: Sheet1
Setd5 Germline mutations	Gender	Intellectual disability	Autistic features	Epilepsy	Eye problems	Facial dysmorphism	Congenital heart defects	Motor impairment	Reference
Complete deletion	Female	+	+	+	-	+	+	+	Gunnarisson and Bruun (2010)
Complete deletion	Female	+	N.R.	+	+	+	-	+	Peltekova et al (2012)
Complete deletion	Female	+	N.R.	-	N.R.	+	-	N.R.	Kellog et al (2013)
Complete deletion (P3)	Male	+	N.R.	+	+	+	-	+	Kuechler et al (2015)
Complete deletion (P4)	Male	+	N.R.	-	N.R.	+	-	+	Kuechler et al (2015)
Complete deletion (P5)	Female	+	N.R.	+	+	+	-	+	Kuechler et al (2015)
Complete deletion (P6)	Female	+	N.R.	-	+	+	-	+	Kuechler et al (2015)
Complete deletion	Male	+	N.R.	+	+	+	+	+	Yagasaki et al (2018)
Partial deletion (ΔEx1-16)	Female	+	N.R.	-	+	+	-	+	Riess et al (2012)
Partial deletion (ΔEx1-16) (P1)	Female	+	-	-	+	+	-	N.R.	Crippa et al (2020)
Partial deletion (ΔEx2-18)	Female	+	N.R.	-	-	+	-	+	Parenti et al (2017)
Partial deletion (ΔEx8) (P1)	Female	+	N.R.	-	+	+	-	+	Kuechler et al (2015)
Partial deletion (ΔEx17-23)	Female	+	N.R.	N.R.	N.R.	+	N.R.	+	Pires et al (2020)
c.582dupA [p.Ala195Serfs*6] (P4)	Female	+	-	-	N.R.	+	N.R.	+	Powis et al (2018)
c.646delC [p.Gln216Serfs*35]	Male	+	N.R.	N.R.	N.R.	+	N.R.	-	Pan et al (2020)
c.894A>G [p.Iso298Met]	Male	+	+	-	N.R.	N.R.	-	N.R.	Russo et al (2018)
c.959delA [p.Lys320Asnfs*15] (P2)	Female	+	-	-	+	+	-	+	Crippa et al (2020)
c.1125dup. [p.Val376Cysfs*9]	N.R.	+	N.R.	N.R.	N.R.	N.R.	N.R.	+	Popp et al (2017)
c.1195A>T [p.Lys399*] (P1)	Male	+	+	-	N.R.	+	+	+	Grozeva et al (2014, 2015)
c.1333C>T [p.Arg445*] (P2)	Male	+	N.R.	-	N.R.	+	+	+	Grozeva et al (2014, 2015)
c.1381_1388del [p.Asn461Profs*14]	Male	+	-	+	-	+	N.R.	-	Green et al (2017)
c.1381_1388del [p.Asn461Profs*14] (P1)	Male	+	N.R.	N.R.	N.R.	+	N.R.	N.R.	Anderson et al (2021)
c.1573_1574delTT [p.Leu525Argfs*17] (P3)	Male	+	+	-	N.R.	+	+	+	Crippa et al (2020)
c.1623_1624insAC [p.Asp542Thrfs*3]	Male	N.R.	+	-	N.R.	+	-	N.R.	Pizzo et al (2019)
c.1655_1656insA [p.Pro553Serfs*4] (P1)	Male	N.R.	+	-	N.R.	+	N.R.	N.R.	Powis et al (2018)
c.1655_1656insA [p.Pro553Serfs*4] (P9)	Male	-	-	+	N.R.	+	+	+	Powis et al (2018)
c.1655_1656insA [p.Pro553Serfs*4] (P10)	Female	-	-	-	N.R.	+	N.R.	N.R.	Powis et al (2018)
c.1783-2A>T [p.Gly594ir*15] (P2)	Male	+	-	-	+	+	+	N.R.	Powis et al (2018)
c.1852C>T [p.Arg618*]	Female	+	+	-	N.R.	+	+	N.R.	Aoi et al (2019)
c.1866C>G [p.Tyr622*] (P3)	Male	+	N.R.	-	N.R.	+	-	+	Grozeva et al (2014, 2015)
c.1967delT [p.Leu656*] (P7)	Male	N.R.	+	+	N.R.	+	+	N.R.	Powis et al (2018)
c.1981delG [p.Glu661Lysfs*5]	Female	+	N.R.	N.R.	N.R.	+	-	+	Pinard et al (2020)
c.2025_2026del AG [p.Gly676Valfs*2]	Female	+	N.R.	N.R.	+	+	+	+	Fang et al (2019)
c.2177_2178del [p.Thr726Asnfs*39] (P4)	Male	+	N.R.	-	N.R.	+	-	+	Grozeva et al (2014, 2015)
c.2212_2213delAT [p.(Met738Valfs*27)]	Male	+	N.R.	-	-	+	-	+	Parenti et al (2017)
c.2302C>T [p.Arg768*] (P2)	Female	+	N.R.	-	+	+	-	+	Kuechler et al (2015)
c.2347-7A>G [p.Arg783Leufs*2]	Male	+	N.R.	+	N.R.	N.R.	+	+	Kobayashi et al (2016)
c.2347-7A>G [p.Arg783Leufs*2] (P5)	Male	+	-	-	N.R.	+	N.R.	+	Powis et al (2018)
c.2347-7A>G [p.Arg783Leufs*2] (P6)	Male	+	+	+	N.R.	+	+	N.R.	Powis et al (2018)
c.2347-7A>G [p.Arg783Leufs*2] (P11)	Female	N.R.	-	-	N.R.	+	+	N.R.	Powis et al (2018)
c.2638G>T [p.Glu880*]	Female	+	N.R.	N.R.	N.R.	+	N.R.	N.R.	Pascolini et al (2022)
c.2918C>G [p.Ser973*] (P1)	Male	+	N.R.	-	-	+	+	+	Szczaluba et al (2016)
c.2918C>G [p.Ser973*] (P2)	Male	+	N.R.	-	-	+	+	+	Szczaluba et al (2016)
c.2918C>G [p.Ser973*] (P3)	Male	+	N.R.	-	-	+	-	N.R.	Szczaluba et al (2016)
c.2955T>A [p.Tyr985*] (P12)	Male	+	+	-	N.R.	+	N.R.	+	Powis et al (2018)
c.2955T>A [p.Tyr985*] (P13)	Male	+	+	-	N.R.	+	N.R.	+	Powis et al (2018)
c.2955T>A [p.Tyr985*] (P14)	Female	-	-	+	N.R.	+	N.R.	+	Powis et al (2018)
c.3001C>T [p.Arg1001*] (P5)	Male	+	N.R.	-	N.R.	+	-	+	Grozeva et al (2014, 2015)
c.3001C>T [p.Arg1001*] (P3)	Male	+	-	-	N.R.	+	N.R.	+	Powis et al (2018)
c.3214C > T [p.Arg1072*] (P2)	Female	+	N.R.	N.R.	N.R.	+	N.R.	N.R.	Anderson et al (2021)
c.3246delT [p. Ala1083Leufs*61] (P8)	Male	N.R.	-	-	N.R.	+	-	+	Powis et al (2018)
c.3771dup [p.Ser1258Glufs*65] (P6)	Male	+	+	-	N.R.	+	-	+	Grozeva et al (2014, 2015)
c.3848_3849insC [p.Ser1286Leu*fs34)	Male	+	N.R.	N.R.	+	N.R.	N.R.	+	Stur et al (2017)
c.3856del [p.Ser1286Leufs*84] (P7)	Male	+	N.R.	-	N.R.	+	-	-	Grozeva et al (2014, 2015)
Percent	Male=60, Female=40	95	50	25	65	100	40	90
